# Supplementary material for: Investigation the Binding Mechanism of Aptamers to Ochratoxin A and Development of Competitive Colorimetric Sensing Platforms
Source: Research Square preprint supplement (doi:10.21203/rs.3.rs-7902970/v1), 2025-11-03
Supplement: Supplementary file 1 [file 1371327d184cff4d99e14a49.docx]

**Supporting Information**

**Investigation the Binding Mechanism of Aptamers to Ochratoxin A and Development of Competitive Colorimetric Sensing Platforms**

Jingping Zhang#, Zhenlin Fan#, Yuzhu Song, Jinyang Zhang, Qinqin Han*

Engineering Research Center for Molecular Diagnosis, Faculty of Life Science and Technology, Kunming University of Science and Technology, Kunming 650500, Yunnan, People’s Republic of China

*Corresponding Author: Qinqin Han

Phone: 86(0871)65939528. Fax: 86(0871)65939528.

Mail: [qqhan10@kust.edu.cn](mailto:qqhan10@kust.edu.cn)

Jingping Zhang and Zhenlin Fan contribute equally

Table S1 Base sequences of the truncated Apt-0 to Apt-8

| **Name** | **Sequence (5’-3’)** |
| --- | --- |
| Apt-0 | TGAGAGGAGCAGATGGACATGGGTGTGGGCGTACCCAGCGCCAGTCGTCAGCGTACGAT CACAGCATGACACACCCGTAA |
| Apt-1 | ATGGACATGGGTGTGGGCGTACCCAGCGCCAGTCGTCAGCGTACGATCACAGCATG |
| Apt-2 | ATGGGTGTGACACCCGTAA |
| Apt-3 | CACAGCATGA |
| Apt-4 | GGCGTACCCAGCGCC |
| Apt-5 | GTCGTCAGCGTACGAT |
| Apt-6 | GTCGTCAGCGTACGATCACAGCATG |
| Apt-7 | ATGGGTGTGGGCGTACCCAGCGCCCACACC CGTAA |
| Apt-8 | ATGGGTGTGGGCGTACCCAGCGCCACAGCATGACACACCCGTAA |
| Bio-Apt-8 | 5’-bio-TTTTTTTTTTATGGGTGTGGGCGTACCCAGCGCCACAGCATGACACACCCGTAA-3 ’ |

Table S2 MST affinity parameters of the OTA aptamers to OTA

| **Name** | **Kd (nmol/L)** | **Signal-to-noise ratio** |
| --- | --- | --- |
| Apt-0 | 151.78 | 20.7 |
| Apt-1 | - | 4.4 |
| Apt-2 | 271.52 | 10.4 |
| Apt-3 | - | 5.3 |
| Apt-4 | 157.33 | 7.8 |
| Apt-5 | 216. 1 | 26.6 |
| Apt-6 | 254.46 | 34. 1 |
| Apt-7 | 87.533 | 13.7 |
| Apt-8 | 78 | 13.6 |

Table S3 ITC thermodynamic information for Apt-0 and Apt-8

| **Name** | **N(sites)** | **Kd(nmol/L)** | **ΔH(cal/mol)** | **ΔG(cal/mol)** | **-TΔS(cal/mol)** |
| --- | --- | --- | --- | --- | --- |
| Apt-0 | 1.03 | 177 | -11.94 | -14.83 | -2.87 |
| Apt-8 | 1.18 | 69.7 | -17.83 | -25.78 | -7.95 |

**
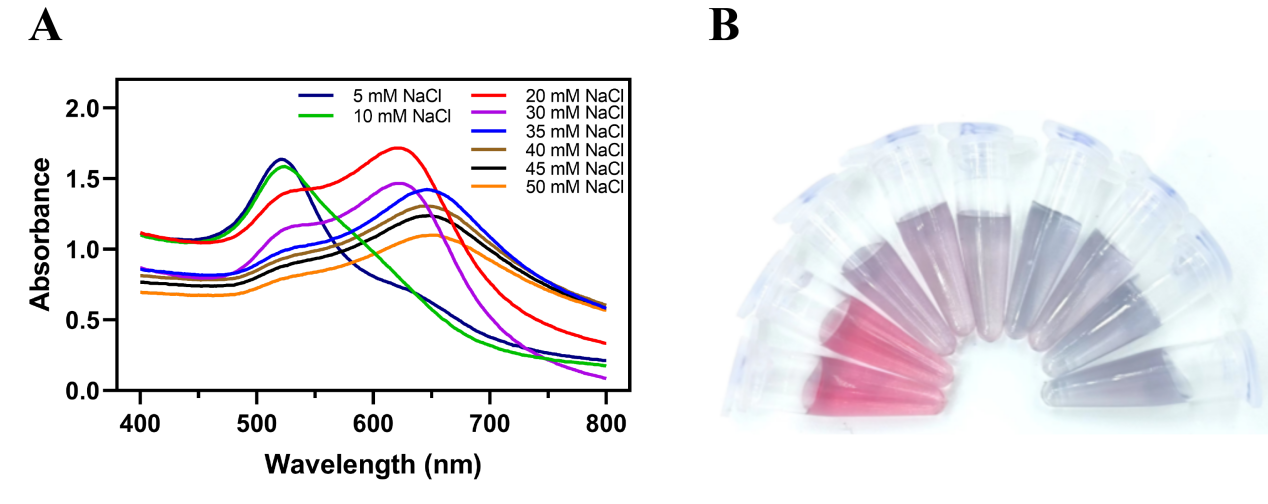
**

Figure S1 (A) AuNPs-UV absorption spectrum (B) AuNPs-TEM

**

**

Figure S2 Potential mechanisms of binding specificity changes in aptamer Apt-0 and Apt-8. (A) Apt-0 at different K+, Na+, Mg2+ concentrations CD. (B) Apt-8 at different K+, Na+, Mg2+ concentrations CD.（C）Comparison of the CD spectra of the Apt-8 and OTA/Apt-8 complexes.（D）Docking results of OTA and Apt-0 (pymol mapping). (E) Docking results of OTA and Apt-0 (pymol mapping). (F) The binding free energy decomposition of MD bases. (G) The important bases decomposition of MD base. (H) Calculation of the binding free energy decomposition of the OTA -8/OTA complex upon molecular dynamics stimulation


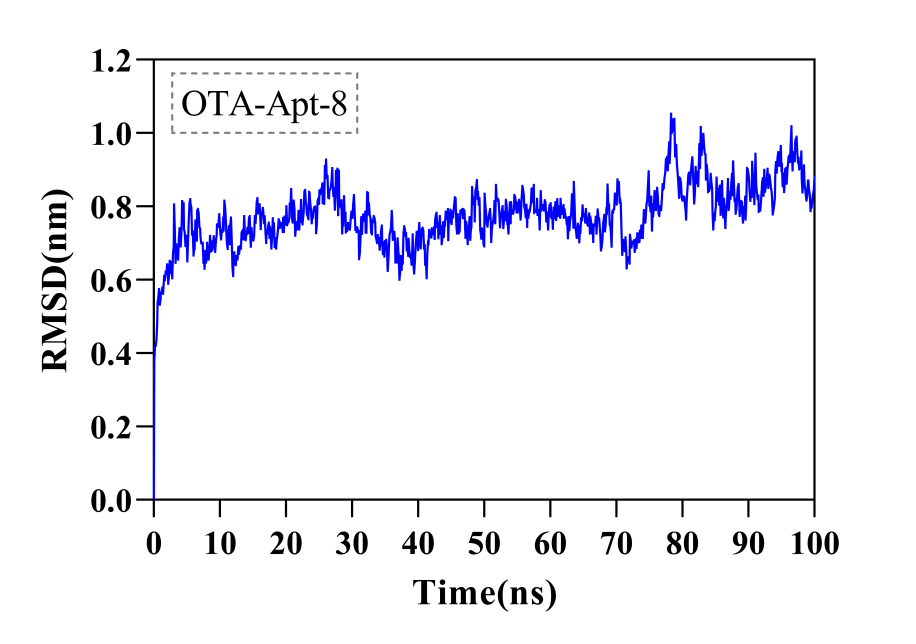


Figure S3 The RMSD curves of the Apt-8/OTA complex under 100 ns of molecular dynamics stimulation


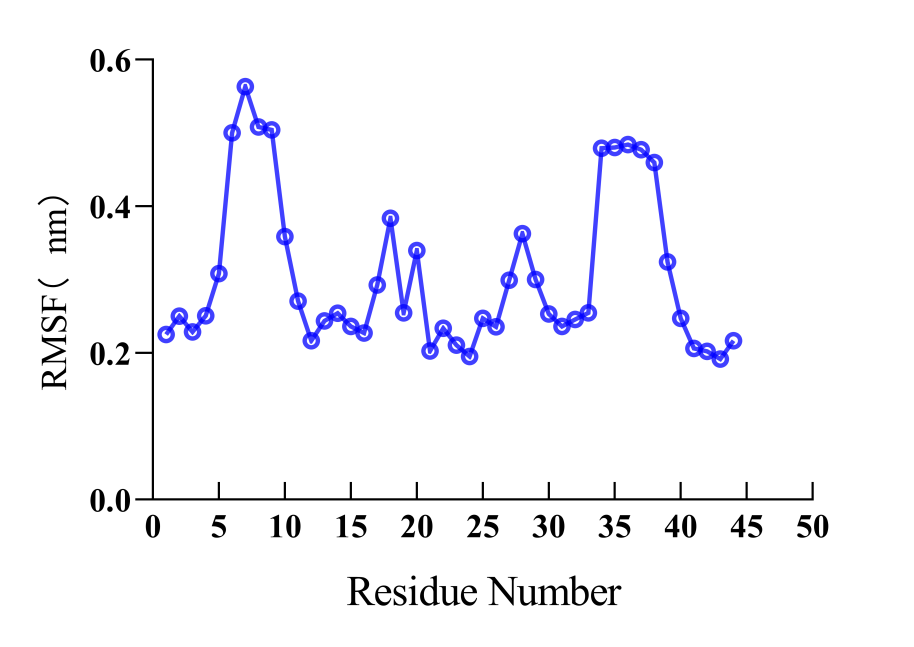


Figure S4 The RMSD curves of the Apt-8/OTA complex under 100 ns of molecular dynamics stimulation


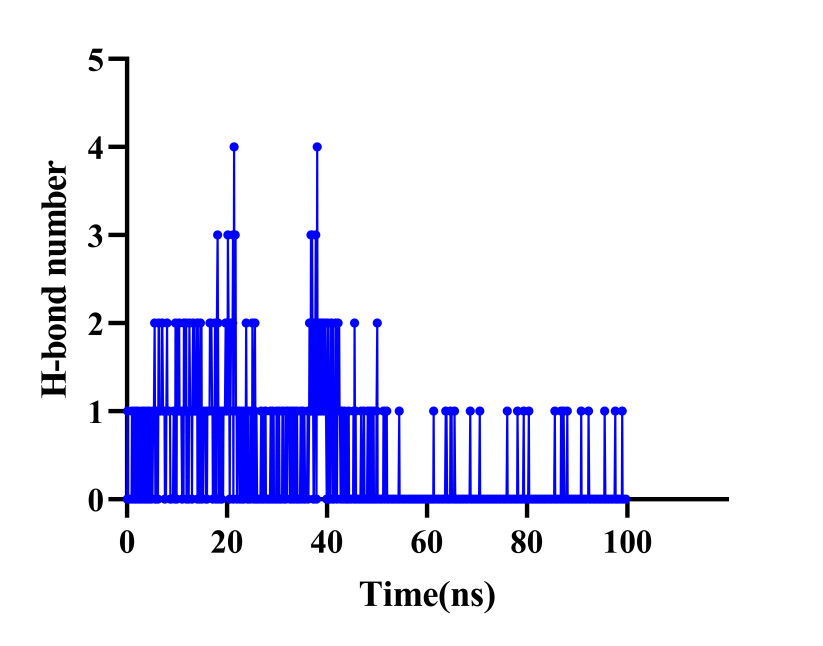


Figure S5 The H-bond curves of the Apt-8/OTA complex under molecular dynamics stimulation


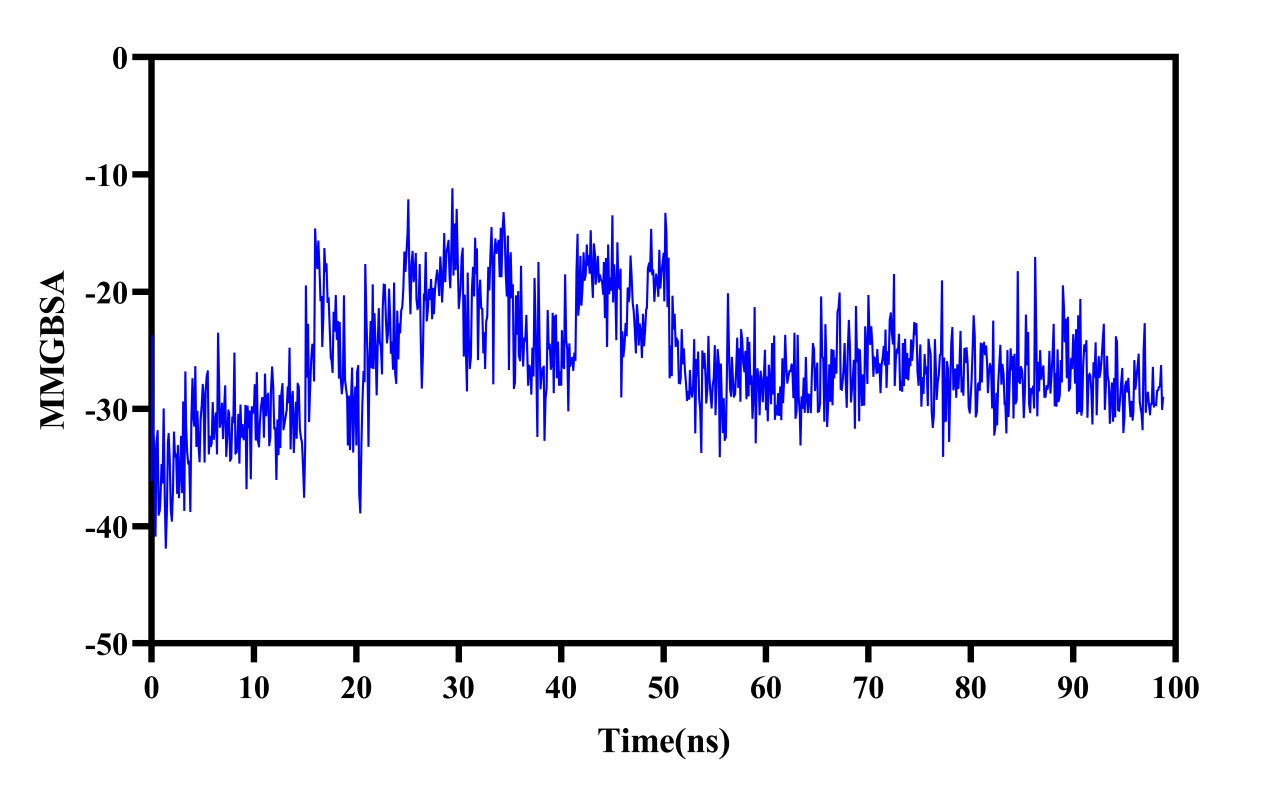


Figure S6 The MMGBSA curve of the Apt-8/OTA complex under molecular dynamics stimulation


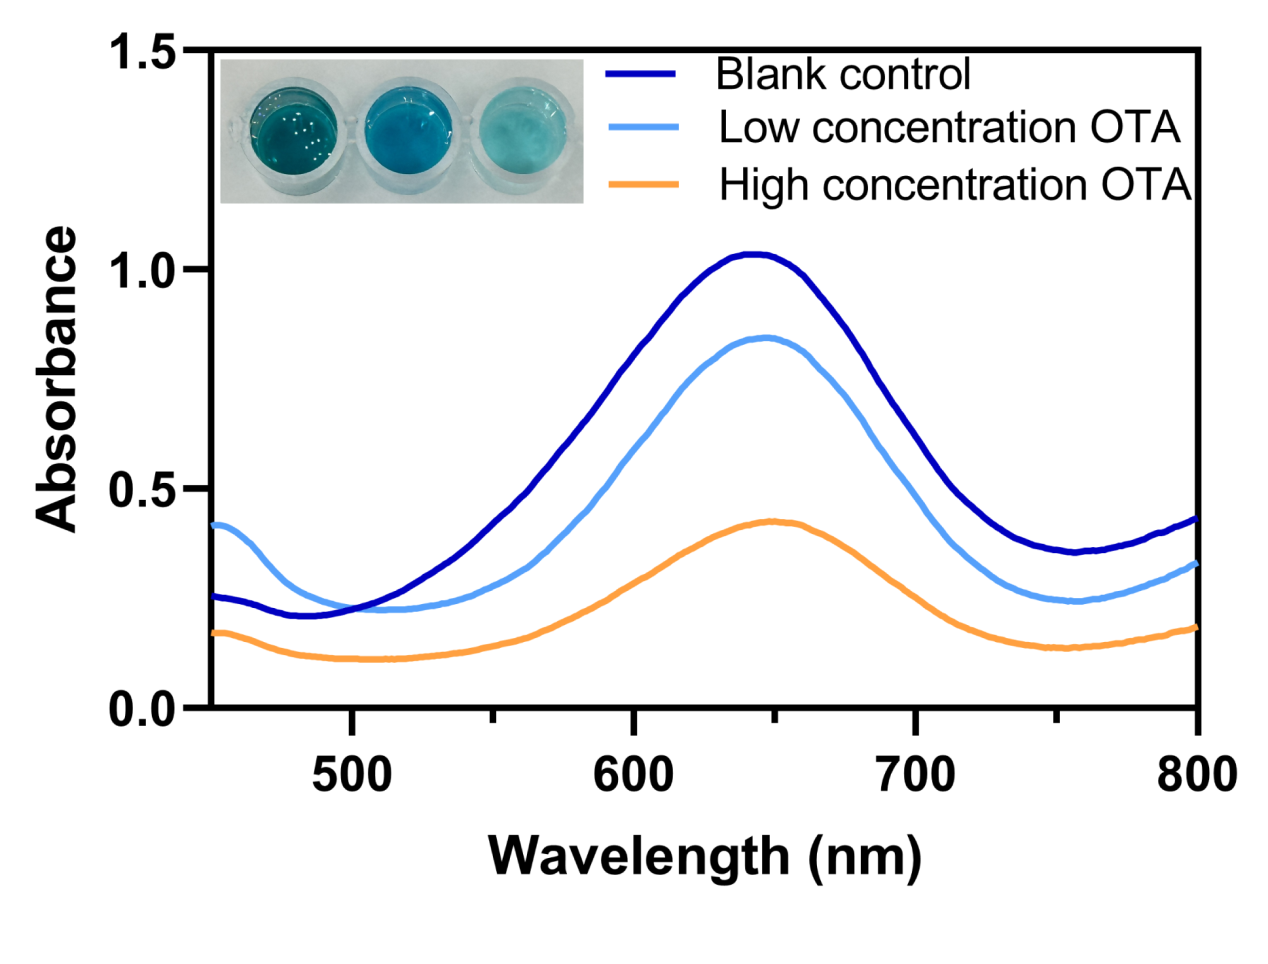


Figure S7 Sensor feasibility study


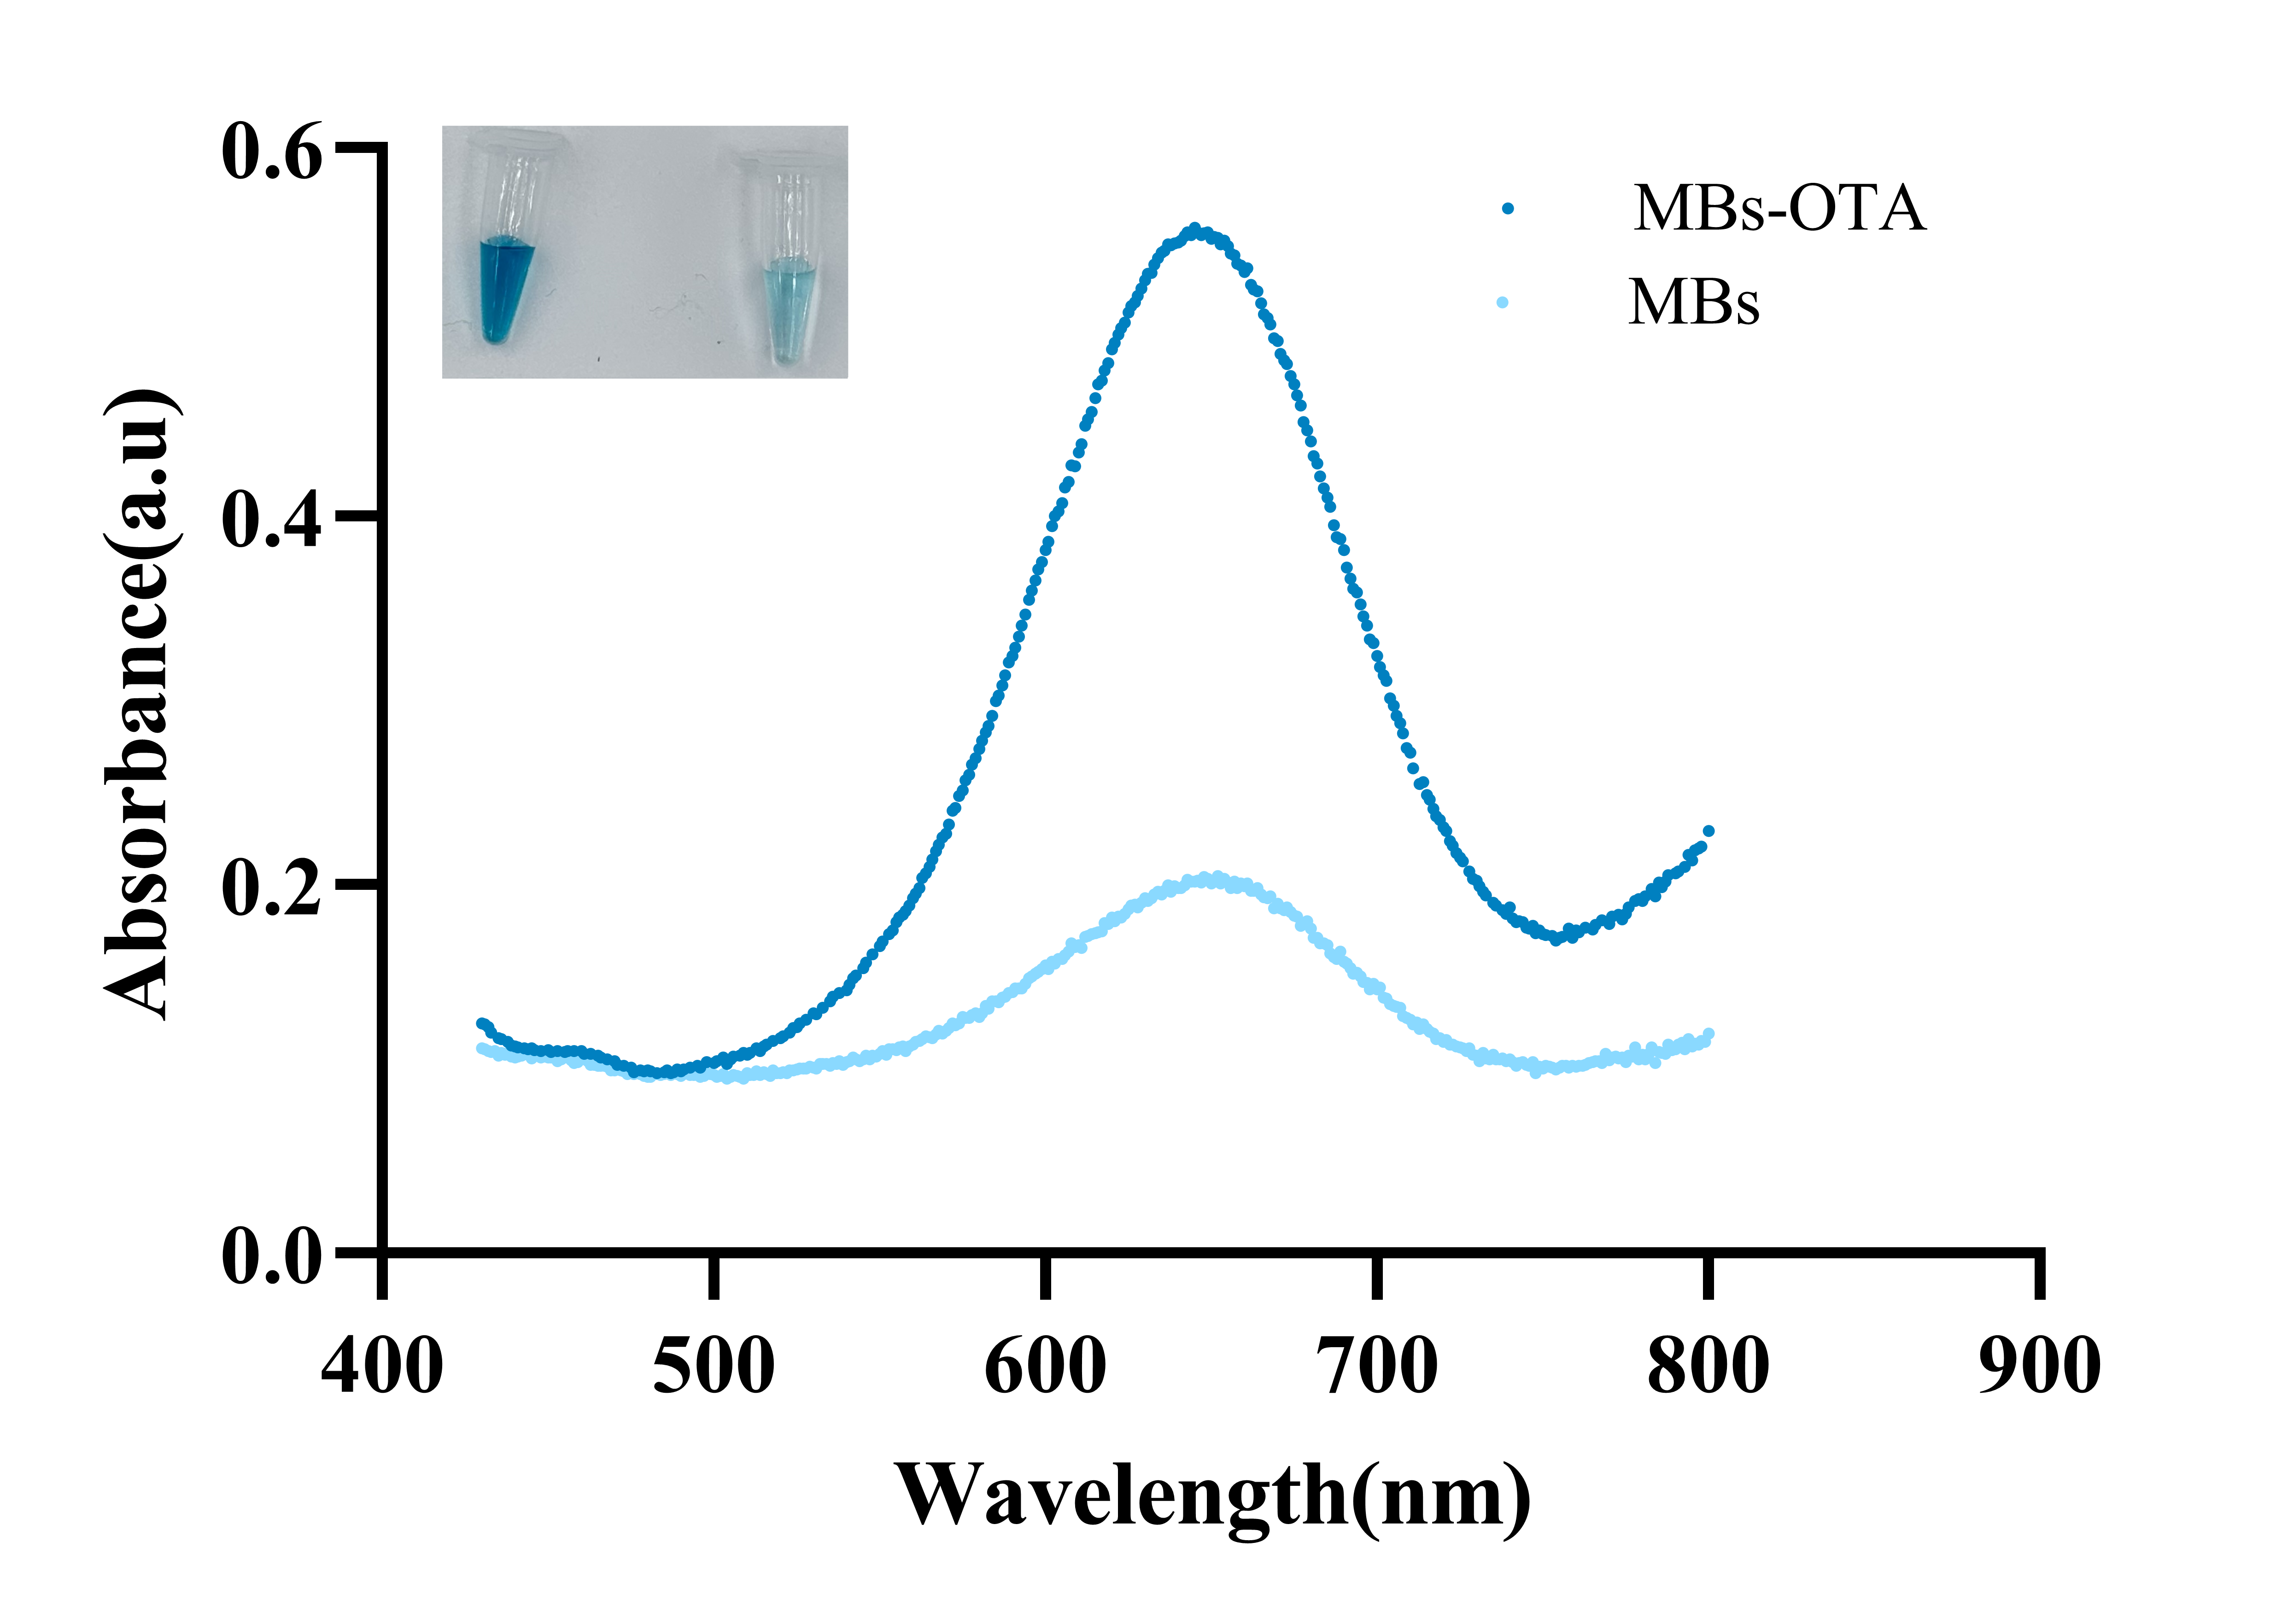


Figure S8 MBs-OTA coupling products validation


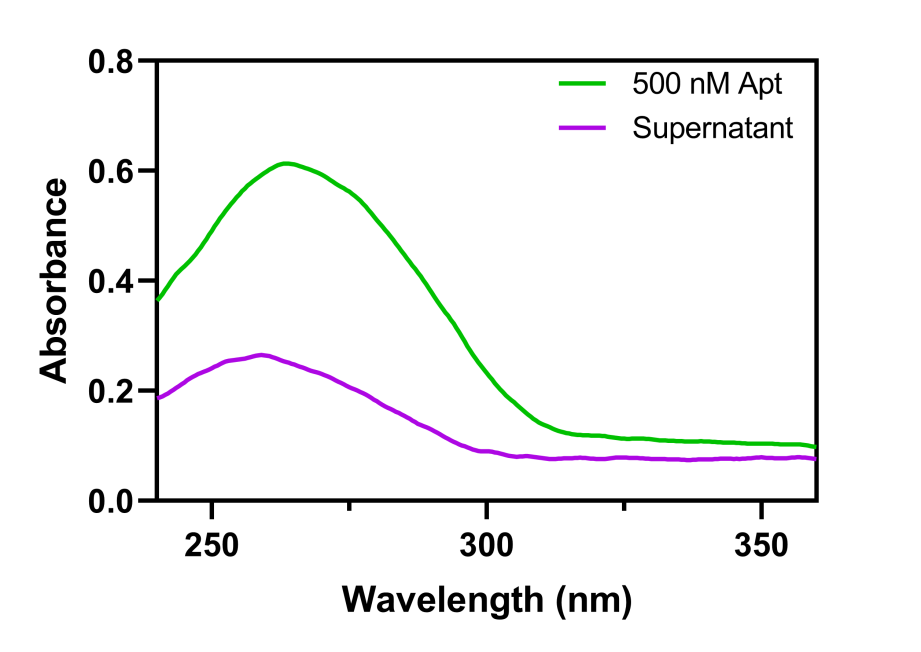


Figure S9 Exploration of OTAamer recognition OTA capability
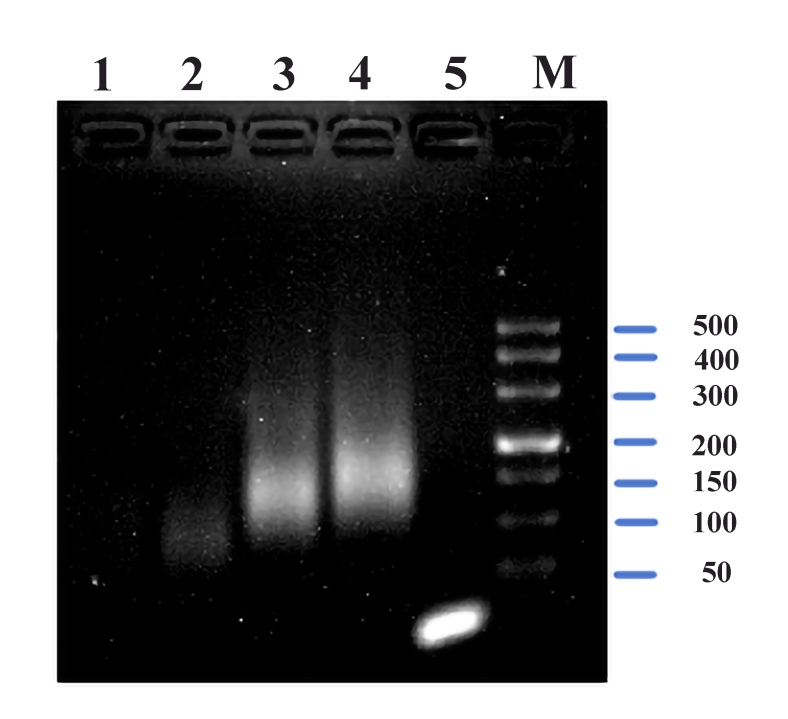


Figure S10 Electrophoreograms of the TdT amplification products
